# Supplementary material for: Variable selection in omics data: A practical evaluation of small sample sizes
Source: PLOS journal article supplement (doi:10.1371/journal.pone.0197910), 2018-06-21
Supplement: S1 (10.1371/journal.pone.0197910.s001) [file journal.pone.0197910.s001]

## S1 Appendix

**Table A.** The summary percentiles of the results across 1000 simulated datasets for  $p = 205$  features,  $\rho = 0.4$  and samples size  $n = 10$ . Each replicate was analyzed with ANOVA, Lasso, Elastic Net and ridge regression. For each replicate simulation the 205 features were simulated according to the set of parameters in Table 1. In particular, here the first three blocks of  $\Sigma$  consisted of 35 features with the fixed correlation value  $\rho$  between the elements within each block, each of these blocks had four features with effect sizes  $\Delta_1, \Delta_2$ , and  $\Delta_3$  and 31 features with no effect size, representing random noise correlated to features with signal. The fourth block had 100 features generated independently from the normal distribution to represent stochastic noise likely present in most omics experiments. For features that are simulated as random noise, selecting that feature would be a false positive. For a feature simulated as different selection is a true positive or an estimate of power. For each method the selection of each feature in each of the 1000 iterations was recorded. For ANOVA feature selection was based on the  $p$ -value, for LASSO/ridge regression and Elastic Net features were selected if they had a non-zero coefficient. The proportion of times that a feature was detected over the 1000 replicates is calculated. For a random noise feature this is then the estimate of the Type I error. As each simulation has multiple features in each category we report the estimated quantiles across features using the R function `quantiles`. For ridge regression there is no shrinkage and so all features are always selected.

| Type                                    | 0%    | 2.4%  | 25%   | 50%   | 75%   | 97.6% | 100%  |
|-----------------------------------------|-------|-------|-------|-------|-------|-------|-------|
| LASSO Bl. 1 (1-4) $\Delta_1$            | 0.007 | 0.007 | 0.007 | 0.008 | 0.011 | 0.013 | 0.013 |
| LASSO Bl. 1 (5-35) Same                 | 0.001 | 0.001 | 0.006 | 0.007 | 0.009 | 0.013 | 0.014 |
| LASSO Bl. 2 (36-39) $\Delta_2$          | 0.018 | 0.019 | 0.023 | 0.027 | 0.029 | 0.030 | 0.030 |
| LASSO Bl. 2 (40-70) Same                | 0.003 | 0.004 | 0.006 | 0.009 | 0.012 | 0.015 | 0.017 |
| LASSO Bl. 3 (71-74) $\Delta_3$          | 0.039 | 0.039 | 0.042 | 0.044 | 0.045 | 0.049 | 0.049 |
| LASSO Bl. 3 (75-105) Same               | 0.005 | 0.005 | 0.006 | 0.008 | 0.009 | 0.013 | 0.014 |
| LASSO Bl. 4 (106-205) Same              | 0.001 | 0.004 | 0.007 | 0.009 | 0.012 | 0.018 | 0.020 |
| Elastic Net Bl. 1 (1-4) $\Delta_1$      | 0.036 | 0.036 | 0.038 | 0.044 | 0.050 | 0.051 | 0.051 |
| Elastic Net Bl. 1 (5-35) Same           | 0.030 | 0.031 | 0.038 | 0.041 | 0.044 | 0.050 | 0.051 |
| Elastic Net Bl. 2 (36-39) $\Delta_2$    | 0.066 | 0.067 | 0.071 | 0.080 | 0.089 | 0.094 | 0.095 |
| Elastic Net Bl. 2 (40-70) Same          | 0.031 | 0.035 | 0.040 | 0.043 | 0.048 | 0.052 | 0.052 |
| Elastic Net Bl. 3 (71-74) $\Delta_3$    | 0.135 | 0.135 | 0.139 | 0.142 | 0.150 | 0.164 | 0.166 |
| Elastic Net Bl. 3 (75-105) Same         | 0.023 | 0.026 | 0.036 | 0.043 | 0.046 | 0.049 | 0.050 |
| Elastic Net Bl. 4 (106-205) Same        | 0.030 | 0.032 | 0.038 | 0.043 | 0.047 | 0.053 | 0.059 |
| ANOVA Bl. 1 (1-4) $\Delta_1$            | 0.059 | 0.059 | 0.062 | 0.065 | 0.068 | 0.070 | 0.070 |
| ANOVA Bl. 1 (5-35) Same                 | 0.042 | 0.042 | 0.049 | 0.051 | 0.056 | 0.060 | 0.061 |
| ANOVA Bl. 2 (36-39) $\Delta_2$          | 0.094 | 0.094 | 0.095 | 0.100 | 0.105 | 0.108 | 0.108 |
| ANOVA Bl. 2 (40-70) Same                | 0.041 | 0.043 | 0.050 | 0.053 | 0.057 | 0.064 | 0.065 |
| ANOVA Bl. 3 (71-74) $\Delta_3$          | 0.187 | 0.188 | 0.194 | 0.196 | 0.204 | 0.221 | 0.223 |
| ANOVA Bl. 3 (75-105) Same               | 0.033 | 0.039 | 0.046 | 0.049 | 0.052 | 0.060 | 0.066 |
| ANOVA Bl. 4 (106-205) Same              | 0.036 | 0.039 | 0.046 | 0.050 | 0.054 | 0.063 | 0.067 |
| ANOVA (FDR-BH) Bl. 1 (1-4) $\Delta_1$   | 0.003 | 0.003 | 0.003 | 0.003 | 0.004 | 0.008 | 0.008 |
| ANOVA (FDR-BH) Bl. 1 (5-35) Same        | 0.000 | 0.001 | 0.002 | 0.002 | 0.004 | 0.005 | 0.006 |
| ANOVA (FDR-BH) Bl. 2 (36-39) $\Delta_2$ | 0.006 | 0.006 | 0.009 | 0.010 | 0.011 | 0.012 | 0.012 |
| ANOVA (FDR-BH) Bl. 2 (40-70) Same       | 0.000 | 0.000 | 0.001 | 0.002 | 0.004 | 0.006 | 0.007 |
| ANOVA (FDR-BH) Bl. 3 (71-74) $\Delta_3$ | 0.014 | 0.014 | 0.015 | 0.016 | 0.017 | 0.021 | 0.021 |
| ANOVA (FDR-BH) Bl. 3 (75-105) Same      | 0.000 | 0.001 | 0.002 | 0.004 | 0.004 | 0.006 | 0.006 |
| ANOVA (FDR-BH) Bl. 4 (106-205) Same     | 0.000 | 0.000 | 0.001 | 0.002 | 0.003 | 0.005 | 0.006 |

**Table B.** The summary percentiles of the results across 1000 simulated datasets for  $p = 205$  features,  $\rho = 0.4$  and samples size  $n = 100$ . Each replicate was analyzed with ANOVA, Lasso, Elastic Net and ridge regression. For each replicate simulation the 205 features were simulated according to the set of parameters in Table 1. In particular, here the first three blocks of  $\Sigma$  consisted of 35 features with the fixed correlation value  $\rho$  between the elements within each block, each of these blocks had four features with effect sizes  $\Delta_1, \Delta_2$ , and  $\Delta_3$  and 31 features with no effect size, representing random noise correlated to features with signal. The fourth block had 100 features generated independently from the normal distribution to represent stochastic noise likely present in most omics experiments. For features that are simulated as random noise, selecting that feature would be a false positive. For a feature simulated as different selection is a true positive or an estimate of power. For each method the selection of each feature in each of the 1000 iterations was recorded. For ANOVA feature selection was based on the  $p$ -value, for LASSO/ridge regression and Elastic Net features were selected if they had a non-zero coefficient. The proportion of times that a feature was detected over the 1000 replicates is calculated. For a random noise feature this is then the estimate of the Type I error. As each simulation has multiple features in each category we report the estimated quantiles across features using the R function `quantiles`. For ridge regression there is no shrinkage and so all features are always selected.

| Type                                    | 0%    | 2.4%  | 25%   | 50%   | 75%   | 97.6% | 100%  |
|-----------------------------------------|-------|-------|-------|-------|-------|-------|-------|
| LASSO Bl. 1 (1-4) $\Delta_1$            | 0.182 | 0.182 | 0.184 | 0.184 | 0.186 | 0.192 | 0.193 |
| LASSO Bl. 1 (5-35) Same                 | 0.051 | 0.053 | 0.062 | 0.065 | 0.069 | 0.083 | 0.086 |
| LASSO Bl. 2 (36-39) $\Delta_2$          | 0.567 | 0.567 | 0.570 | 0.576 | 0.582 | 0.586 | 0.587 |
| LASSO Bl. 2 (40-70) Same                | 0.075 | 0.076 | 0.084 | 0.088 | 0.092 | 0.110 | 0.117 |
| LASSO Bl. 3 (71-74) $\Delta_3$          | 0.885 | 0.885 | 0.887 | 0.888 | 0.891 | 0.896 | 0.897 |
| LASSO Bl. 3 (75-105) Same               | 0.165 | 0.169 | 0.184 | 0.192 | 0.197 | 0.209 | 0.209 |
| LASSO Bl. 4 (106-205) Same              | 0.091 | 0.099 | 0.113 | 0.118 | 0.126 | 0.142 | 0.147 |
| Elastic Net Bl. 1 (1-4) $\Delta_1$      | 0.301 | 0.301 | 0.306 | 0.314 | 0.322 | 0.329 | 0.330 |
| Elastic Net Bl. 1 (5-35) Same           | 0.124 | 0.125 | 0.136 | 0.144 | 0.150 | 0.163 | 0.167 |
| Elastic Net Bl. 2 (36-39) $\Delta_2$    | 0.749 | 0.749 | 0.750 | 0.756 | 0.764 | 0.776 | 0.777 |
| Elastic Net Bl. 2 (40-70) Same          | 0.153 | 0.156 | 0.163 | 0.173 | 0.178 | 0.200 | 0.205 |
| Elastic Net Bl. 3 (71-74) $\Delta_3$    | 0.966 | 0.967 | 0.972 | 0.974 | 0.976 | 0.979 | 0.979 |
| Elastic Net Bl. 3 (75-105) Same         | 0.235 | 0.248 | 0.267 | 0.277 | 0.286 | 0.296 | 0.296 |
| Elastic Net Bl. 4 (106-205) Same        | 0.188 | 0.197 | 0.211 | 0.220 | 0.229 | 0.255 | 0.264 |
| ANOVA Bl. 1 (1-4) $\Delta_1$            | 0.159 | 0.160 | 0.170 | 0.176 | 0.179 | 0.184 | 0.185 |
| ANOVA Bl. 1 (5-35) Same                 | 0.038 | 0.039 | 0.044 | 0.048 | 0.051 | 0.059 | 0.065 |
| ANOVA Bl. 2 (36-39) $\Delta_2$          | 0.661 | 0.663 | 0.683 | 0.691 | 0.696 | 0.705 | 0.706 |
| ANOVA Bl. 2 (40-70) Same                | 0.045 | 0.046 | 0.051 | 0.056 | 0.059 | 0.069 | 0.075 |
| ANOVA Bl. 3 (71-74) $\Delta_3$          | 0.976 | 0.976 | 0.977 | 0.978 | 0.979 | 0.980 | 0.980 |
| ANOVA Bl. 3 (75-105) Same               | 0.032 | 0.033 | 0.042 | 0.047 | 0.053 | 0.056 | 0.057 |
| ANOVA Bl. 4 (106-205) Same              | 0.035 | 0.037 | 0.047 | 0.052 | 0.056 | 0.064 | 0.070 |
| ANOVA (FDR-BH) Bl. 1 (1-4) $\Delta_1$   | 0.051 | 0.052 | 0.057 | 0.060 | 0.061 | 0.062 | 0.062 |
| ANOVA (FDR-BH) Bl. 1 (5-35) Same        | 0.003 | 0.004 | 0.007 | 0.010 | 0.010 | 0.015 | 0.017 |
| ANOVA (FDR-BH) Bl. 2 (36-39) $\Delta_2$ | 0.396 | 0.397 | 0.406 | 0.412 | 0.416 | 0.422 | 0.423 |
| ANOVA (FDR-BH) Bl. 2 (40-70) Same       | 0.006 | 0.007 | 0.009 | 0.012 | 0.014 | 0.016 | 0.017 |
| ANOVA (FDR-BH) Bl. 3 (71-74) $\Delta_3$ | 0.876 | 0.876 | 0.880 | 0.882 | 0.883 | 0.887 | 0.887 |
| ANOVA (FDR-BH) Bl. 3 (75-105) Same      | 0.004 | 0.004 | 0.006 | 0.008 | 0.010 | 0.014 | 0.015 |
| ANOVA (FDR-BH) Bl. 4 (106-205) Same     | 0.003 | 0.004 | 0.007 | 0.008 | 0.011 | 0.014 | 0.014 |

**Table C.** The summary percentiles of the results across 1000 simulated datasets for  $p = 2050$  features,  $\rho = 0.4$  and samples size  $n = 10$ . Each replicate was analyzed with ANOVA, Lasso, Elastic Net and ridge regression. For each replicate simulation the 2050 features were simulated according to the set of parameters in Table 1. In particular, here the first three blocks of  $\Sigma$  consisted of 350 features with the fixed correlation value  $\rho$  between the elements within each block, each of these blocks had four features with effect sizes  $\Delta_1, \Delta_2$ , and  $\Delta_3$  and 346 features with no effect size, representing random noise correlated to features with signal. The fourth block had 1000 features generated independently from the normal distribution to represent stochastic noise likely present in most omics experiments. For features that are simulated as random noise, selecting that feature would be a false positive. For a feature simulated as different selection is a true positive or an estimate of power. For each method the selection of each feature in each of the 1000 iterations was recorded. For ANOVA feature selection was based on the  $p$ -value, for LASSO/ridge regression and Elastic Net features were selected if they had a non-zero coefficient. The proportion of times that a feature was detected over the 1000 replicates is calculated. For a random noise feature this is then the estimate of the Type I error. As each simulation has multiple features in each category we report the estimated quantiles across features using the R function `quantiles`. For ridge regression there is no shrinkage and so all features are always selected.

| Type                                      | 0%    | 2.4%  | 25%   | 50%   | 75%   | 97.6% | 100%  |
|-------------------------------------------|-------|-------|-------|-------|-------|-------|-------|
| LASSO Bl. 1 (1-4) $\Delta_1$              | 0.000 | 0.000 | 0.001 | 0.002 | 0.002 | 0.002 | 0.002 |
| LASSO Bl. 1 (5-350) Same                  | 0.000 | 0.000 | 0.000 | 0.001 | 0.001 | 0.003 | 0.004 |
| LASSO Bl. 2 (351-354) $\Delta_2$          | 0.001 | 0.001 | 0.002 | 0.003 | 0.004 | 0.004 | 0.004 |
| LASSO Bl. 2 (355-700) Same                | 0.000 | 0.000 | 0.000 | 0.001 | 0.001 | 0.003 | 0.004 |
| LASSO Bl. 3 (701-704) $\Delta_3$          | 0.007 | 0.007 | 0.007 | 0.008 | 0.008 | 0.008 | 0.008 |
| LASSO Bl. 3 (705-1050) Same               | 0.000 | 0.000 | 0.000 | 0.001 | 0.001 | 0.003 | 0.004 |
| LASSO Bl. 4 (1051-2050) Same              | 0.000 | 0.000 | 0.000 | 0.001 | 0.002 | 0.004 | 0.006 |
| Elastic Net Bl. 1 (1-4) $\Delta_1$        | 0.007 | 0.007 | 0.007 | 0.008 | 0.008 | 0.009 | 0.009 |
| Elastic Net Bl. 1 (5-350) Same            | 0.001 | 0.002 | 0.005 | 0.007 | 0.009 | 0.012 | 0.017 |
| Elastic Net Bl. 2 (351-354) $\Delta_2$    | 0.012 | 0.012 | 0.013 | 0.014 | 0.014 | 0.016 | 0.016 |
| Elastic Net Bl. 2 (355-700) Same          | 0.001 | 0.003 | 0.005 | 0.007 | 0.008 | 0.012 | 0.015 |
| Elastic Net Bl. 3 (701-704) $\Delta_3$    | 0.035 | 0.035 | 0.036 | 0.037 | 0.038 | 0.040 | 0.040 |
| Elastic Net Bl. 3 (705-1050) Same         | 0.001 | 0.002 | 0.005 | 0.006 | 0.008 | 0.012 | 0.014 |
| Elastic Net Bl. 4 (1051-2050) Same        | 0.000 | 0.002 | 0.005 | 0.006 | 0.008 | 0.012 | 0.014 |
| ANOVA Bl. 1 (1-4) $\Delta_1$              | 0.051 | 0.051 | 0.054 | 0.058 | 0.062 | 0.069 | 0.070 |
| ANOVA Bl. 1 (5-350) Same                  | 0.025 | 0.038 | 0.047 | 0.051 | 0.056 | 0.064 | 0.073 |
| ANOVA Bl. 2 (351-354) $\Delta_2$          | 0.097 | 0.098 | 0.109 | 0.113 | 0.113 | 0.114 | 0.114 |
| ANOVA Bl. 2 (355-700) Same                | 0.036 | 0.039 | 0.046 | 0.050 | 0.055 | 0.064 | 0.069 |
| ANOVA Bl. 3 (701-704) $\Delta_3$          | 0.192 | 0.193 | 0.198 | 0.204 | 0.214 | 0.228 | 0.230 |
| ANOVA Bl. 3 (705-1050) Same               | 0.033 | 0.037 | 0.045 | 0.050 | 0.054 | 0.062 | 0.068 |
| ANOVA Bl. 4 (1051-2050) Same              | 0.031 | 0.037 | 0.046 | 0.050 | 0.055 | 0.064 | 0.074 |
| ANOVA (FDR-BH) Bl. 1 (1-4) $\Delta_1$     | 0.001 | 0.001 | 0.001 | 0.001 | 0.002 | 0.003 | 0.003 |
| ANOVA (FDR-BH) Bl. 1 (5-350) Same         | 0.000 | 0.000 | 0.000 | 0.001 | 0.001 | 0.003 | 0.003 |
| ANOVA (FDR-BH) Bl. 2 (351-354) $\Delta_2$ | 0.001 | 0.001 | 0.001 | 0.001 | 0.002 | 0.003 | 0.003 |
| ANOVA (FDR-BH) Bl. 2 (355-700) Same       | 0.000 | 0.000 | 0.000 | 0.001 | 0.001 | 0.002 | 0.004 |
| ANOVA (FDR-BH) Bl. 3 (701-704) $\Delta_3$ | 0.002 | 0.002 | 0.003 | 0.003 | 0.004 | 0.005 | 0.005 |
| ANOVA (FDR-BH) Bl. 3 (705-1050) Same      | 0.000 | 0.000 | 0.000 | 0.000 | 0.001 | 0.002 | 0.003 |
| ANOVA (FDR-BH) Bl. 4 (1051-2050) Same     | 0.000 | 0.000 | 0.000 | 0.000 | 0.000 | 0.002 | 0.003 |

**Table D.** The summary percentiles of the results across 1000 simulated datasets for  $p = 2050$  features,  $\rho = 0.4$  and samples size  $n = 100$ . Each replicate was analyzed with ANOVA, Lasso, Elastic Net and ridge regression. For each replicate simulation the 2050 features were simulated according to the set of parameters in Table 1. In particular, here the first three blocks of  $\Sigma$  consisted of 350 features with the fixed correlation value  $\rho$  between the elements within each block, each of these blocks had four features with effect sizes  $\Delta_1, \Delta_2$ , and  $\Delta_3$  and 346 features with no effect size, representing random noise correlated to features with signal. The fourth block had 1000 features generated independently from the normal distribution to represent stochastic noise likely present in most omics experiments. For features that are simulated as random noise, selecting that feature would be a false positive. For a feature simulated as different selection is a true positive or an estimate of power. For each method the selection of each feature in each of the 1000 iterations was recorded. For ANOVA feature selection was based on the  $p$ -value, for LASSO/ridge regression and Elastic Net features were selected if they had a non-zero coefficient. The proportion of times that a feature was detected over the 1000 replicates is calculated. For a random noise feature this is then the estimate of the Type I error. As each simulation has multiple features in each category we report the estimated quantiles across features using the R function `quantiles`. For ridge regression there is no shrinkage and so all features are always selected.

| Type                                      | 0%    | 2.4%  | 25%   | 50%   | 75%   | 97.6% | 100%  |
|-------------------------------------------|-------|-------|-------|-------|-------|-------|-------|
| LASSO Bl. 1 (1-4) $\Delta_1$              | 0.031 | 0.031 | 0.033 | 0.040 | 0.048 | 0.052 | 0.052 |
| LASSO Bl. 1 (5-350) Same                  | 0.000 | 0.002 | 0.004 | 0.005 | 0.007 | 0.010 | 0.015 |
| LASSO Bl. 2 (351-354) $\Delta_2$          | 0.327 | 0.328 | 0.338 | 0.344 | 0.349 | 0.354 | 0.355 |
| LASSO Bl. 2 (355-700) Same                | 0.000 | 0.001 | 0.004 | 0.006 | 0.008 | 0.012 | 0.015 |
| LASSO Bl. 3 (701-704) $\Delta_3$          | 0.749 | 0.749 | 0.749 | 0.751 | 0.755 | 0.761 | 0.762 |
| LASSO Bl. 3 (705-1050) Same               | 0.006 | 0.009 | 0.014 | 0.016 | 0.019 | 0.025 | 0.026 |
| LASSO Bl. 4 (1051-2050) Same              | 0.004 | 0.010 | 0.015 | 0.018 | 0.021 | 0.027 | 0.034 |
| Elastic Net Bl. 1 (1-4) $\Delta_1$        | 0.063 | 0.063 | 0.066 | 0.080 | 0.094 | 0.095 | 0.095 |
| Elastic Net Bl. 1 (5-350) Same            | 0.003 | 0.007 | 0.011 | 0.013 | 0.016 | 0.021 | 0.023 |
| Elastic Net Bl. 2 (351-354) $\Delta_2$    | 0.499 | 0.500 | 0.512 | 0.522 | 0.530 | 0.535 | 0.536 |
| Elastic Net Bl. 2 (355-700) Same          | 0.005 | 0.008 | 0.012 | 0.014 | 0.017 | 0.023 | 0.026 |
| Elastic Net Bl. 3 (701-704) $\Delta_3$    | 0.898 | 0.899 | 0.904 | 0.908 | 0.911 | 0.915 | 0.915 |
| Elastic Net Bl. 3 (705-1050) Same         | 0.013 | 0.017 | 0.023 | 0.027 | 0.031 | 0.037 | 0.041 |
| Elastic Net Bl. 4 (1051-2050) Same        | 0.020 | 0.027 | 0.036 | 0.040 | 0.044 | 0.052 | 0.063 |
| ANOVA Bl. 1 (1-4) $\Delta_1$              | 0.138 | 0.139 | 0.146 | 0.151 | 0.162 | 0.186 | 0.188 |
| ANOVA Bl. 1 (5-350) Same                  | 0.033 | 0.036 | 0.045 | 0.050 | 0.053 | 0.062 | 0.067 |
| ANOVA Bl. 2 (351-354) $\Delta_2$          | 0.673 | 0.674 | 0.679 | 0.688 | 0.700 | 0.714 | 0.715 |
| ANOVA Bl. 2 (355-700) Same                | 0.030 | 0.035 | 0.044 | 0.048 | 0.053 | 0.060 | 0.065 |
| ANOVA Bl. 3 (701-704) $\Delta_3$          | 0.971 | 0.971 | 0.975 | 0.978 | 0.979 | 0.980 | 0.980 |
| ANOVA Bl. 3 (705-1050) Same               | 0.032 | 0.040 | 0.048 | 0.053 | 0.058 | 0.067 | 0.074 |
| ANOVA Bl. 4 (1051-2050) Same              | 0.024 | 0.037 | 0.045 | 0.050 | 0.055 | 0.064 | 0.075 |
| ANOVA (FDR-BH) Bl. 1 (1-4) $\Delta_1$     | 0.005 | 0.005 | 0.006 | 0.007 | 0.008 | 0.009 | 0.009 |
| ANOVA (FDR-BH) Bl. 1 (5-350) Same         | 0.000 | 0.000 | 0.001 | 0.002 | 0.002 | 0.004 | 0.006 |
| ANOVA (FDR-BH) Bl. 2 (351-354) $\Delta_2$ | 0.124 | 0.124 | 0.126 | 0.130 | 0.145 | 0.173 | 0.176 |
| ANOVA (FDR-BH) Bl. 2 (355-700) Same       | 0.000 | 0.000 | 0.000 | 0.001 | 0.001 | 0.003 | 0.004 |
| ANOVA (FDR-BH) Bl. 3 (701-704) $\Delta_3$ | 0.620 | 0.621 | 0.625 | 0.632 | 0.637 | 0.638 | 0.638 |
| ANOVA (FDR-BH) Bl. 3 (705-1050) Same      | 0.000 | 0.000 | 0.001 | 0.002 | 0.003 | 0.004 | 0.007 |
| ANOVA (FDR-BH) Bl. 4 (1051-2050) Same     | 0.000 | 0.000 | 0.000 | 0.000 | 0.001 | 0.003 | 0.005 |

**Table E.** The summary percentiles of the results across 1000 simulated datasets for  $p = 205$  features,  $\rho = 0.8$  and samples size  $n = 10$ . Each replicate was analyzed with ANOVA, Lasso, Elastic Net and ridge regression. For each replicate simulation the 205 features were simulated according to the set of parameters in Table 1. In particular, here the first three blocks of  $\Sigma$  consisted of 35 features with the fixed correlation value  $\rho$  between the elements within each block, each of these blocks had four features with effect sizes  $\Delta_1, \Delta_2$ , and  $\Delta_3$  and 31 features with no effect size, representing random noise correlated to features with signal. The fourth block had 100 features generated independently from the normal distribution to represent stochastic noise likely present in most omics experiments. For features that are simulated as random noise, selecting that feature would be a false positive. For a feature simulated as different selection is a true positive or an estimate of power. For each method the selection of each feature in each of the 1000 iterations was recorded. For ANOVA feature selection was based on the  $p$ -value, for LASSO/ridge regression and Elastic Net features were selected if they had a non-zero coefficient. The proportion of times that a feature was detected over the 1000 replicates is calculated. For a random noise feature this is then the estimate of the Type I error. As each simulation has multiple features in each category we report the estimated quantiles across features using the R function `quantiles`. For ridge regression there is no shrinkage and so all features are always selected.

| Type                                    | 0%    | 2.4%  | 25%   | 50%   | 75%   | 97.6% | 100%  |
|-----------------------------------------|-------|-------|-------|-------|-------|-------|-------|
| LASSO Bl. 1 (1-4) $\Delta_1$            | 0.005 | 0.005 | 0.006 | 0.007 | 0.007 | 0.008 | 0.008 |
| LASSO Bl. 1 (5-35) Same                 | 0.002 | 0.002 | 0.004 | 0.004 | 0.007 | 0.011 | 0.012 |
| LASSO Bl. 2 (36-39) $\Delta_2$          | 0.011 | 0.011 | 0.012 | 0.014 | 0.015 | 0.016 | 0.016 |
| LASSO Bl. 2 (40-70) Same                | 0.002 | 0.002 | 0.003 | 0.004 | 0.005 | 0.007 | 0.008 |
| LASSO Bl. 3 (71-74) $\Delta_3$          | 0.025 | 0.025 | 0.030 | 0.032 | 0.034 | 0.036 | 0.036 |
| LASSO Bl. 3 (75-105) Same               | 0.000 | 0.001 | 0.002 | 0.003 | 0.004 | 0.006 | 0.006 |
| LASSO Bl. 4 (106-205) Same              | 0.004 | 0.006 | 0.010 | 0.012 | 0.015 | 0.022 | 0.023 |
| Elastic Net Bl. 1 (1-4) $\Delta_1$      | 0.035 | 0.035 | 0.035 | 0.036 | 0.039 | 0.043 | 0.044 |
| Elastic Net Bl. 1 (5-35) Same           | 0.020 | 0.021 | 0.028 | 0.031 | 0.034 | 0.037 | 0.038 |
| Elastic Net Bl. 2 (36-39) $\Delta_2$    | 0.064 | 0.064 | 0.065 | 0.067 | 0.070 | 0.071 | 0.071 |
| Elastic Net Bl. 2 (40-70) Same          | 0.022 | 0.023 | 0.026 | 0.030 | 0.031 | 0.038 | 0.040 |
| Elastic Net Bl. 3 (71-74) $\Delta_3$    | 0.124 | 0.125 | 0.133 | 0.137 | 0.140 | 0.144 | 0.145 |
| Elastic Net Bl. 3 (75-105) Same         | 0.018 | 0.018 | 0.022 | 0.025 | 0.028 | 0.032 | 0.034 |
| Elastic Net Bl. 4 (106-205) Same        | 0.027 | 0.037 | 0.043 | 0.047 | 0.052 | 0.058 | 0.064 |
| ANOVA Bl. 1 (1-4) $\Delta_1$            | 0.055 | 0.055 | 0.057 | 0.059 | 0.060 | 0.062 | 0.062 |
| ANOVA Bl. 1 (5-35) Same                 | 0.041 | 0.042 | 0.048 | 0.051 | 0.054 | 0.059 | 0.060 |
| ANOVA Bl. 2 (36-39) $\Delta_2$          | 0.094 | 0.094 | 0.098 | 0.102 | 0.106 | 0.107 | 0.107 |
| ANOVA Bl. 2 (40-70) Same                | 0.045 | 0.046 | 0.051 | 0.054 | 0.058 | 0.063 | 0.065 |
| ANOVA Bl. 3 (71-74) $\Delta_3$          | 0.189 | 0.189 | 0.191 | 0.194 | 0.197 | 0.203 | 0.204 |
| ANOVA Bl. 3 (75-105) Same               | 0.033 | 0.035 | 0.038 | 0.042 | 0.045 | 0.052 | 0.052 |
| ANOVA Bl. 4 (106-205) Same              | 0.039 | 0.040 | 0.047 | 0.050 | 0.055 | 0.064 | 0.067 |
| ANOVA (FDR-BH) Bl. 1 (1-4) $\Delta_1$   | 0.013 | 0.013 | 0.013 | 0.014 | 0.014 | 0.014 | 0.014 |
| ANOVA (FDR-BH) Bl. 1 (5-35) Same        | 0.008 | 0.009 | 0.011 | 0.013 | 0.014 | 0.017 | 0.018 |
| ANOVA (FDR-BH) Bl. 2 (36-39) $\Delta_2$ | 0.008 | 0.008 | 0.010 | 0.010 | 0.011 | 0.011 | 0.011 |
| ANOVA (FDR-BH) Bl. 2 (40-70) Same       | 0.009 | 0.009 | 0.011 | 0.012 | 0.014 | 0.016 | 0.016 |
| ANOVA (FDR-BH) Bl. 3 (71-74) $\Delta_3$ | 0.017 | 0.017 | 0.019 | 0.020 | 0.022 | 0.023 | 0.023 |
| ANOVA (FDR-BH) Bl. 3 (75-105) Same      | 0.005 | 0.005 | 0.008 | 0.008 | 0.010 | 0.012 | 0.013 |
| ANOVA (FDR-BH) Bl. 4 (106-205) Same     | 0.000 | 0.000 | 0.002 | 0.003 | 0.004 | 0.006 | 0.006 |

**Table F.** The summary percentiles of the results across 1000 simulated datasets for  $p = 205$  features,  $\rho = 0.8$  and samples size  $n = 100$ . Each replicate was analyzed with ANOVA, Lasso, Elastic Net and ridge regression. For each replicate simulation the 205 features were simulated according to the set of parameters in Table 1. In particular, here the first three blocks of  $\Sigma$  consisted of 35 features with the fixed correlation value  $\rho$  between the elements within each block, each of these blocks had four features with effect sizes  $\Delta_1, \Delta_2$ , and  $\Delta_3$  and 31 features with no effect size, representing random noise correlated to features with signal. The fourth block had 100 features generated independently from the normal distribution to represent stochastic noise likely present in most omics experiments. For features that are simulated as random noise, selecting that feature would be a false positive. For a feature simulated as different selection is a true positive or an estimate of power. For each method the selection of each feature in each of the 1000 iterations was recorded. For ANOVA feature selection was based on the  $p$ -value, for LASSO/ridge regression and Elastic Net features were selected if they had a non-zero coefficient. The proportion of times that a feature was detected over the 1000 replicates is calculated. For a random noise feature this is then the estimate of the Type I error. As each simulation has multiple features in each category we report the estimated quantiles across features using the R function `quantiles`. For ridge regression there is no shrinkage and so all features are always selected.

| Type                                    | 0%    | 2.4%  | 25%   | 50%   | 75%   | 97.6% | 100%  |
|-----------------------------------------|-------|-------|-------|-------|-------|-------|-------|
| LASSO Bl. 1 (1-4) $\Delta_1$            | 0.152 | 0.152 | 0.154 | 0.158 | 0.164 | 0.169 | 0.170 |
| LASSO Bl. 1 (5-35) Same                 | 0.018 | 0.019 | 0.025 | 0.028 | 0.030 | 0.037 | 0.038 |
| LASSO Bl. 2 (36-39) $\Delta_2$          | 0.524 | 0.527 | 0.556 | 0.575 | 0.590 | 0.605 | 0.607 |
| LASSO Bl. 2 (40-70) Same                | 0.075 | 0.079 | 0.096 | 0.102 | 0.108 | 0.120 | 0.120 |
| LASSO Bl. 3 (71-74) $\Delta_3$          | 0.959 | 0.959 | 0.962 | 0.964 | 0.966 | 0.970 | 0.970 |
| LASSO Bl. 3 (75-105) Same               | 0.297 | 0.297 | 0.309 | 0.318 | 0.331 | 0.345 | 0.345 |
| LASSO Bl. 4 (106-205) Same              | 0.192 | 0.195 | 0.212 | 0.222 | 0.230 | 0.247 | 0.252 |
| Elastic Net Bl. 1 (1-4) $\Delta_1$      | 0.368 | 0.369 | 0.380 | 0.390 | 0.395 | 0.396 | 0.396 |
| Elastic Net Bl. 1 (5-35) Same           | 0.076 | 0.081 | 0.090 | 0.099 | 0.106 | 0.115 | 0.119 |
| Elastic Net Bl. 2 (36-39) $\Delta_2$    | 0.912 | 0.913 | 0.926 | 0.932 | 0.937 | 0.941 | 0.942 |
| Elastic Net Bl. 2 (40-70) Same          | 0.235 | 0.241 | 0.257 | 0.266 | 0.276 | 0.294 | 0.297 |
| Elastic Net Bl. 3 (71-74) $\Delta_3$    | 0.999 | 0.999 | 1.000 | 1.000 | 1.000 | 1.000 | 1.000 |
| Elastic Net Bl. 3 (75-105) Same         | 0.471 | 0.472 | 0.484 | 0.492 | 0.498 | 0.521 | 0.538 |
| Elastic Net Bl. 4 (106-205) Same        | 0.365 | 0.370 | 0.391 | 0.402 | 0.412 | 0.428 | 0.438 |
| ANOVA Bl. 1 (1-4) $\Delta_1$            | 0.159 | 0.159 | 0.163 | 0.166 | 0.168 | 0.169 | 0.169 |
| ANOVA Bl. 1 (5-35) Same                 | 0.042 | 0.043 | 0.050 | 0.054 | 0.058 | 0.063 | 0.065 |
| ANOVA Bl. 2 (36-39) $\Delta_2$          | 0.679 | 0.680 | 0.694 | 0.704 | 0.710 | 0.716 | 0.717 |
| ANOVA Bl. 2 (40-70) Same                | 0.041 | 0.041 | 0.046 | 0.049 | 0.053 | 0.054 | 0.054 |
| ANOVA Bl. 3 (71-74) $\Delta_3$          | 0.974 | 0.974 | 0.976 | 0.978 | 0.979 | 0.981 | 0.981 |
| ANOVA Bl. 3 (75-105) Same               | 0.039 | 0.040 | 0.050 | 0.054 | 0.057 | 0.064 | 0.065 |
| ANOVA Bl. 4 (106-205) Same              | 0.039 | 0.041 | 0.047 | 0.050 | 0.054 | 0.061 | 0.063 |
| ANOVA (FDR-BH) Bl. 1 (1-4) $\Delta_1$   | 0.051 | 0.051 | 0.052 | 0.055 | 0.058 | 0.062 | 0.062 |
| ANOVA (FDR-BH) Bl. 1 (5-35) Same        | 0.016 | 0.017 | 0.020 | 0.022 | 0.024 | 0.027 | 0.028 |
| ANOVA (FDR-BH) Bl. 2 (36-39) $\Delta_2$ | 0.425 | 0.425 | 0.428 | 0.433 | 0.438 | 0.440 | 0.440 |
| ANOVA (FDR-BH) Bl. 2 (40-70) Same       | 0.011 | 0.011 | 0.013 | 0.015 | 0.016 | 0.020 | 0.020 |
| ANOVA (FDR-BH) Bl. 3 (71-74) $\Delta_3$ | 0.863 | 0.864 | 0.868 | 0.870 | 0.871 | 0.871 | 0.871 |
| ANOVA (FDR-BH) Bl. 3 (75-105) Same      | 0.011 | 0.011 | 0.015 | 0.017 | 0.018 | 0.021 | 0.021 |
| ANOVA (FDR-BH) Bl. 4 (106-205) Same     | 0.004 | 0.004 | 0.007 | 0.009 | 0.011 | 0.014 | 0.017 |

**Table G.** The summary percentiles of the results across 1000 simulated datasets for  $p = 2050$  features,  $\rho = 0.8$  and samples size  $n = 10$ . Each replicate was analyzed with ANOVA, Lasso, Elastic Net and ridge regression. For each replicate simulation the 2050 features were simulated according to the set of parameters in Table 1. In particular, here the first three blocks of  $\Sigma$  consisted of 350 features with the fixed correlation value  $\rho$  between the elements within each block, each of these blocks had four features with effect sizes  $\Delta_1, \Delta_2$ , and  $\Delta_3$  and 346 features with no effect size, representing random noise correlated to features with signal. The fourth block had 1000 features generated independently from the normal distribution to represent stochastic noise likely present in most omics experiments. For features that are simulated as random noise, selecting that feature would be a false positive. For a feature simulated as different selection is a true positive or an estimate of power. For each method the selection of each feature in each of the 1000 iterations was recorded. For ANOVA feature selection was based on the  $p$ -value, for LASSO/ridge regression and Elastic Net features were selected if they had a non-zero coefficient. The proportion of times that a feature was detected over the 1000 replicates is calculated. For a random noise feature this is then the estimate of the Type I error. As each simulation has multiple features in each category we report the estimated quantiles across features using the R function `quantiles`. For ridge regression there is no shrinkage and so all features are always selected.

| Type                                      | 0%    | 2.4%  | 25%   | 50%   | 75%   | 97.6% | 100%  |
|-------------------------------------------|-------|-------|-------|-------|-------|-------|-------|
| LASSO Bl. 1 (1-4) $\Delta_1$              | 0.000 | 0.000 | 0.000 | 0.000 | 0.001 | 0.001 | 0.001 |
| LASSO Bl. 1 (5-350) Same                  | 0.000 | 0.000 | 0.000 | 0.000 | 0.001 | 0.002 | 0.002 |
| LASSO Bl. 2 (351-354) $\Delta_2$          | 0.000 | 0.000 | 0.001 | 0.001 | 0.001 | 0.001 | 0.001 |
| LASSO Bl. 2 (355-700) Same                | 0.000 | 0.000 | 0.000 | 0.000 | 0.000 | 0.002 | 0.003 |
| LASSO Bl. 3 (701-704) $\Delta_3$          | 0.004 | 0.004 | 0.005 | 0.006 | 0.007 | 0.008 | 0.008 |
| LASSO Bl. 3 (705-1050) Same               | 0.000 | 0.000 | 0.000 | 0.000 | 0.001 | 0.002 | 0.003 |
| LASSO Bl. 4 (1051-2050) Same              | 0.000 | 0.000 | 0.001 | 0.001 | 0.002 | 0.004 | 0.006 |
| Elastic Net Bl. 1 (1-4) $\Delta_1$        | 0.005 | 0.005 | 0.006 | 0.008 | 0.008 | 0.010 | 0.010 |
| Elastic Net Bl. 1 (5-350) Same            | 0.001 | 0.001 | 0.004 | 0.005 | 0.007 | 0.010 | 0.013 |
| Elastic Net Bl. 2 (351-354) $\Delta_2$    | 0.010 | 0.010 | 0.011 | 0.014 | 0.018 | 0.020 | 0.020 |
| Elastic Net Bl. 2 (355-700) Same          | 0.000 | 0.000 | 0.002 | 0.003 | 0.004 | 0.008 | 0.009 |
| Elastic Net Bl. 3 (701-704) $\Delta_3$    | 0.035 | 0.036 | 0.043 | 0.048 | 0.051 | 0.053 | 0.053 |
| Elastic Net Bl. 3 (705-1050) Same         | 0.000 | 0.001 | 0.003 | 0.004 | 0.006 | 0.008 | 0.011 |
| Elastic Net Bl. 4 (1051-2050) Same        | 0.001 | 0.004 | 0.007 | 0.008 | 0.010 | 0.014 | 0.020 |
| ANOVA Bl. 1 (1-4) $\Delta_1$              | 0.061 | 0.061 | 0.062 | 0.064 | 0.066 | 0.073 | 0.074 |
| ANOVA Bl. 1 (5-350) Same                  | 0.036 | 0.041 | 0.050 | 0.053 | 0.057 | 0.065 | 0.067 |
| ANOVA Bl. 2 (351-354) $\Delta_2$          | 0.086 | 0.086 | 0.090 | 0.094 | 0.098 | 0.099 | 0.099 |
| ANOVA Bl. 2 (355-700) Same                | 0.029 | 0.032 | 0.037 | 0.040 | 0.044 | 0.051 | 0.057 |
| ANOVA Bl. 3 (701-704) $\Delta_3$          | 0.203 | 0.203 | 0.205 | 0.209 | 0.214 | 0.219 | 0.220 |
| ANOVA Bl. 3 (705-1050) Same               | 0.032 | 0.037 | 0.044 | 0.048 | 0.051 | 0.060 | 0.068 |
| ANOVA Bl. 4 (1051-2050) Same              | 0.032 | 0.037 | 0.045 | 0.050 | 0.054 | 0.065 | 0.081 |
| ANOVA (FDR-BH) Bl. 1 (1-4) $\Delta_1$     | 0.010 | 0.010 | 0.011 | 0.012 | 0.012 | 0.013 | 0.013 |
| ANOVA (FDR-BH) Bl. 1 (5-350) Same         | 0.005 | 0.006 | 0.009 | 0.010 | 0.011 | 0.014 | 0.015 |
| ANOVA (FDR-BH) Bl. 2 (351-354) $\Delta_2$ | 0.007 | 0.007 | 0.008 | 0.008 | 0.008 | 0.008 | 0.008 |
| ANOVA (FDR-BH) Bl. 2 (355-700) Same       | 0.001 | 0.003 | 0.005 | 0.006 | 0.007 | 0.009 | 0.010 |
| ANOVA (FDR-BH) Bl. 3 (701-704) $\Delta_3$ | 0.006 | 0.006 | 0.008 | 0.008 | 0.008 | 0.010 | 0.010 |
| ANOVA (FDR-BH) Bl. 3 (705-1050) Same      | 0.002 | 0.004 | 0.006 | 0.007 | 0.008 | 0.009 | 0.011 |
| ANOVA (FDR-BH) Bl. 4 (1051-2050) Same     | 0.000 | 0.000 | 0.000 | 0.001 | 0.002 | 0.003 | 0.005 |



**Table H.** The summary percentiles of the results across 1000 simulated datasets for  $p = 2050$  features,  $\rho = 0.8$  and samples size  $n = 100$ . Each replicate was analyzed with ANOVA, Lasso, Elastic Net and ridge regression. For each replicate simulation the 2050 features were simulated according to the set of parameters in Table 1. In particular, here the first three blocks of  $\Sigma$  consisted of 350 features with the fixed correlation value  $\rho$  between the elements within each block, each of these blocks had four features with effect sizes  $\Delta_1, \Delta_2$ , and  $\Delta_3$  and 346 features with no effect size, representing random noise correlated to features with signal. The fourth block had 1000 features generated independently from the normal distribution to represent stochastic noise likely present in most omics experiments. For features that are simulated as random noise, selecting that feature would be a false positive. For a feature simulated as different selection is a true positive or an estimate of power. For each method the selection of each feature in each of the 1000 iterations was recorded. For ANOVA feature selection was based on the  $p$ -value, for LASSO/ridge regression and Elastic Net features were selected if they had a non-zero coefficient. The proportion of times that a feature was detected over the 1000 replicates is calculated. For a random noise feature this is then the estimate of the Type I error. As each simulation has multiple features in each category we report the estimated quantiles across features using the R function `quantiles`. For ridge regression there is no shrinkage and so all features are always selected.

| Type                                      | 0%    | 2.4%  | 25%   | 50%   | 75%   | 97.6% | 100%  |
|-------------------------------------------|-------|-------|-------|-------|-------|-------|-------|
| LASSO Bl. 1 (1-4) $\Delta_1$              | 0.031 | 0.031 | 0.035 | 0.036 | 0.037 | 0.039 | 0.039 |
| LASSO Bl. 1 (5-350) Same                  | 0.000 | 0.000 | 0.000 | 0.001 | 0.002 | 0.004 | 0.004 |
| LASSO Bl. 2 (351-354) $\Delta_2$          | 0.233 | 0.233 | 0.234 | 0.242 | 0.249 | 0.253 | 0.253 |
| LASSO Bl. 2 (355-700) Same                | 0.000 | 0.000 | 0.000 | 0.001 | 0.002 | 0.004 | 0.005 |
| LASSO Bl. 3 (701-704) $\Delta_3$          | 0.659 | 0.660 | 0.666 | 0.671 | 0.677 | 0.684 | 0.685 |
| LASSO Bl. 3 (705-1050) Same               | 0.007 | 0.009 | 0.014 | 0.017 | 0.019 | 0.026 | 0.028 |
| LASSO Bl. 4 (1051-2050) Same              | 0.014 | 0.019 | 0.026 | 0.030 | 0.033 | 0.040 | 0.046 |
| Elastic Net Bl. 1 (1-4) $\Delta_1$        | 0.065 | 0.065 | 0.070 | 0.074 | 0.078 | 0.078 | 0.078 |
| Elastic Net Bl. 1 (5-350) Same            | 0.000 | 0.000 | 0.002 | 0.003 | 0.004 | 0.007 | 0.009 |
| Elastic Net Bl. 2 (351-354) $\Delta_2$    | 0.432 | 0.433 | 0.443 | 0.453 | 0.460 | 0.465 | 0.465 |
| Elastic Net Bl. 2 (355-700) Same          | 0.000 | 0.000 | 0.002 | 0.004 | 0.005 | 0.009 | 0.010 |
| Elastic Net Bl. 3 (701-704) $\Delta_3$    | 0.880 | 0.881 | 0.885 | 0.887 | 0.888 | 0.890 | 0.890 |
| Elastic Net Bl. 3 (705-1050) Same         | 0.016 | 0.019 | 0.024 | 0.028 | 0.031 | 0.039 | 0.044 |
| Elastic Net Bl. 4 (1051-2050) Same        | 0.028 | 0.037 | 0.046 | 0.051 | 0.056 | 0.066 | 0.072 |
| ANOVA Bl. 1 (1-4) $\Delta_1$              | 0.137 | 0.137 | 0.137 | 0.138 | 0.140 | 0.147 | 0.148 |
| ANOVA Bl. 1 (5-350) Same                  | 0.028 | 0.034 | 0.040 | 0.043 | 0.047 | 0.054 | 0.056 |
| ANOVA Bl. 2 (351-354) $\Delta_2$          | 0.694 | 0.695 | 0.702 | 0.708 | 0.711 | 0.713 | 0.713 |
| ANOVA Bl. 2 (355-700) Same                | 0.034 | 0.038 | 0.045 | 0.048 | 0.052 | 0.060 | 0.065 |
| ANOVA Bl. 3 (701-704) $\Delta_3$          | 0.969 | 0.969 | 0.974 | 0.975 | 0.976 | 0.978 | 0.978 |
| ANOVA Bl. 3 (705-1050) Same               | 0.037 | 0.042 | 0.048 | 0.051 | 0.056 | 0.063 | 0.072 |
| ANOVA Bl. 4 (1051-2050) Same              | 0.031 | 0.037 | 0.046 | 0.050 | 0.055 | 0.065 | 0.076 |
| ANOVA (FDR-BH) Bl. 1 (1-4) $\Delta_1$     | 0.004 | 0.004 | 0.005 | 0.006 | 0.008 | 0.010 | 0.010 |
| ANOVA (FDR-BH) Bl. 1 (5-350) Same         | 0.002 | 0.002 | 0.004 | 0.005 | 0.006 | 0.008 | 0.009 |
| ANOVA (FDR-BH) Bl. 2 (351-354) $\Delta_2$ | 0.140 | 0.140 | 0.144 | 0.148 | 0.151 | 0.155 | 0.155 |
| ANOVA (FDR-BH) Bl. 2 (355-700) Same       | 0.004 | 0.005 | 0.007 | 0.008 | 0.009 | 0.010 | 0.012 |
| ANOVA (FDR-BH) Bl. 3 (701-704) $\Delta_3$ | 0.580 | 0.581 | 0.588 | 0.593 | 0.597 | 0.602 | 0.603 |
| ANOVA (FDR-BH) Bl. 3 (705-1050) Same      | 0.002 | 0.003 | 0.005 | 0.006 | 0.006 | 0.008 | 0.009 |
| ANOVA (FDR-BH) Bl. 4 (1051-2050) Same     | 0.000 | 0.000 | 0.000 | 0.001 | 0.002 | 0.003 | 0.006 |



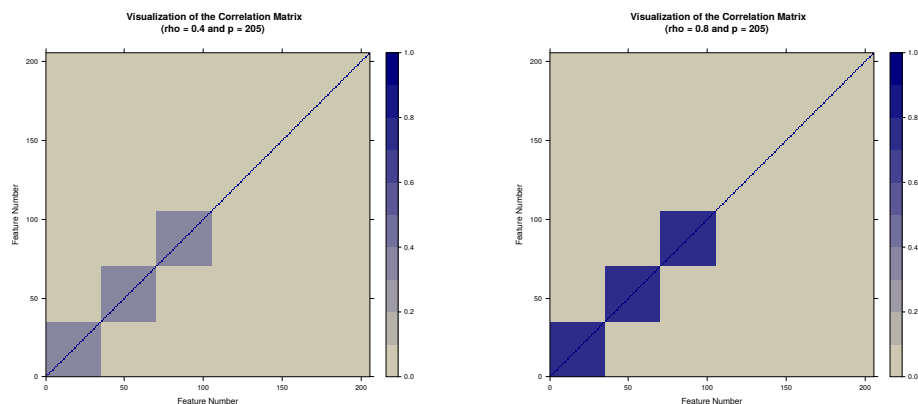

**Figure A.** Visualization of the dependency structure for the simulated data. Features are simulated in three blocks, where the correlation within each block is either  $\rho = 0.4$  (left panel) and  $\rho = 0.8$  (right panel). No dependency is simulated between blocks and as an independent set of features representing random noise is also simulated.

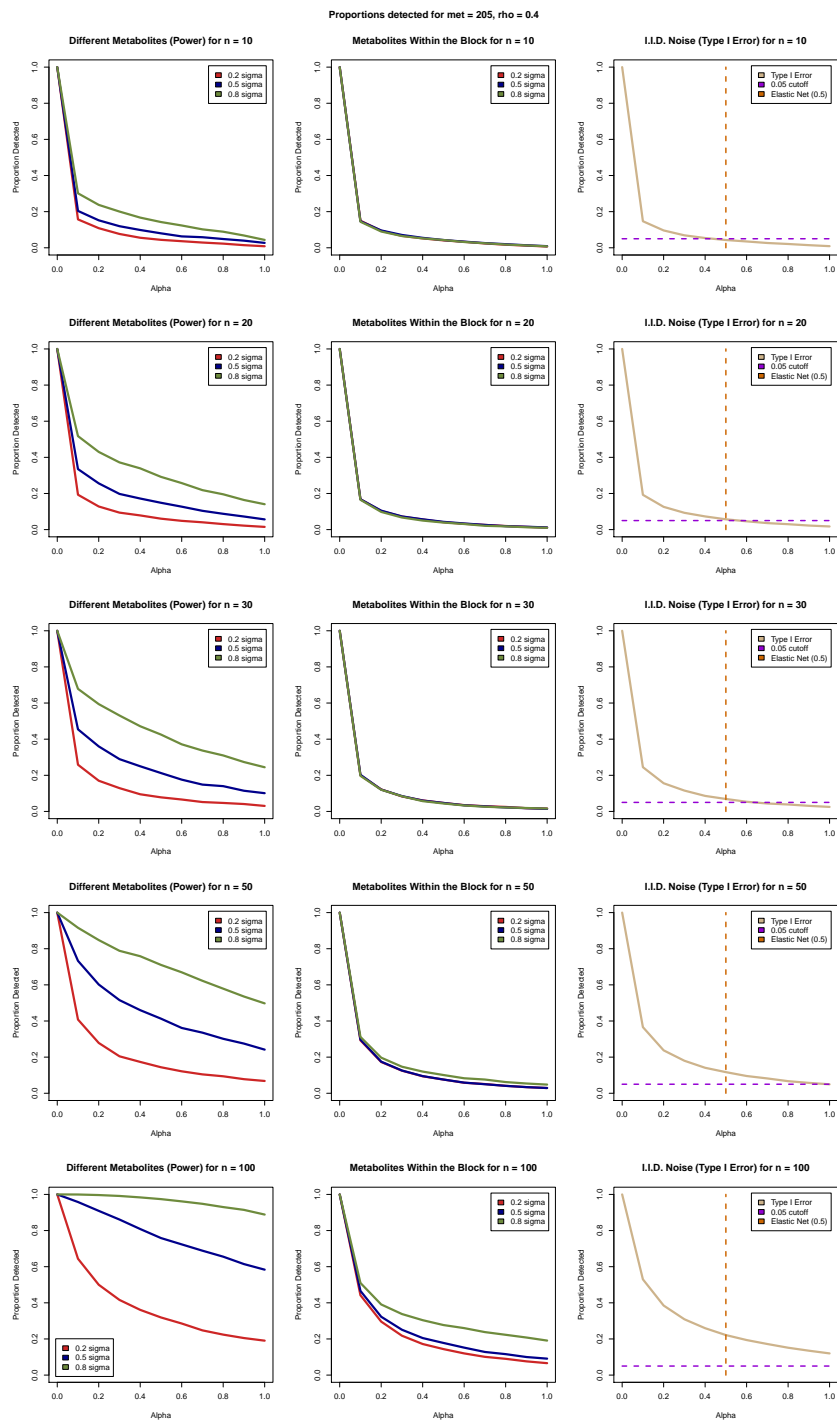

**Figure B.** Visualization of power (left column) and Type I error (right column) estimates for  $p = 205$  features,  $\rho = 0.4$ , and multiple sample sizes. Each row of plots corresponds to different sample size. The value of the penalty split parameter  $\alpha$  is plotted on the  $x$ -axis. Type I error and power estimates are plotted on  $y$ -axis for the values of  $\alpha$  in the range of  $[0; 1]$  with 0.1 increments. In the left column power estimates are provided based on the four different features for each of the effect sizes ( $\Delta_1 = 0.2$  is the red line,  $\Delta_2 = 0.5$  is the blue line, and  $\Delta_3 = 0.8$  is the green line). In the right column Type I error estimates are provided (beige lines) based on the random noise features together with a 0.05 threshold plotted as a purple dashed line. The vertical dashed line in the right column plots corresponds to penalty split value  $\alpha = 0.5$ . In the middle column of the plots the proportions of detected non-different features within each block correlated to different ones for each of the blocks and corresponding effect sizes ( $\Delta_1 = 0.2$  is the red line,  $\Delta_2 = 0.5$  is the blue line, and  $\Delta_3 = 0.8$  is the green line) are displayed.

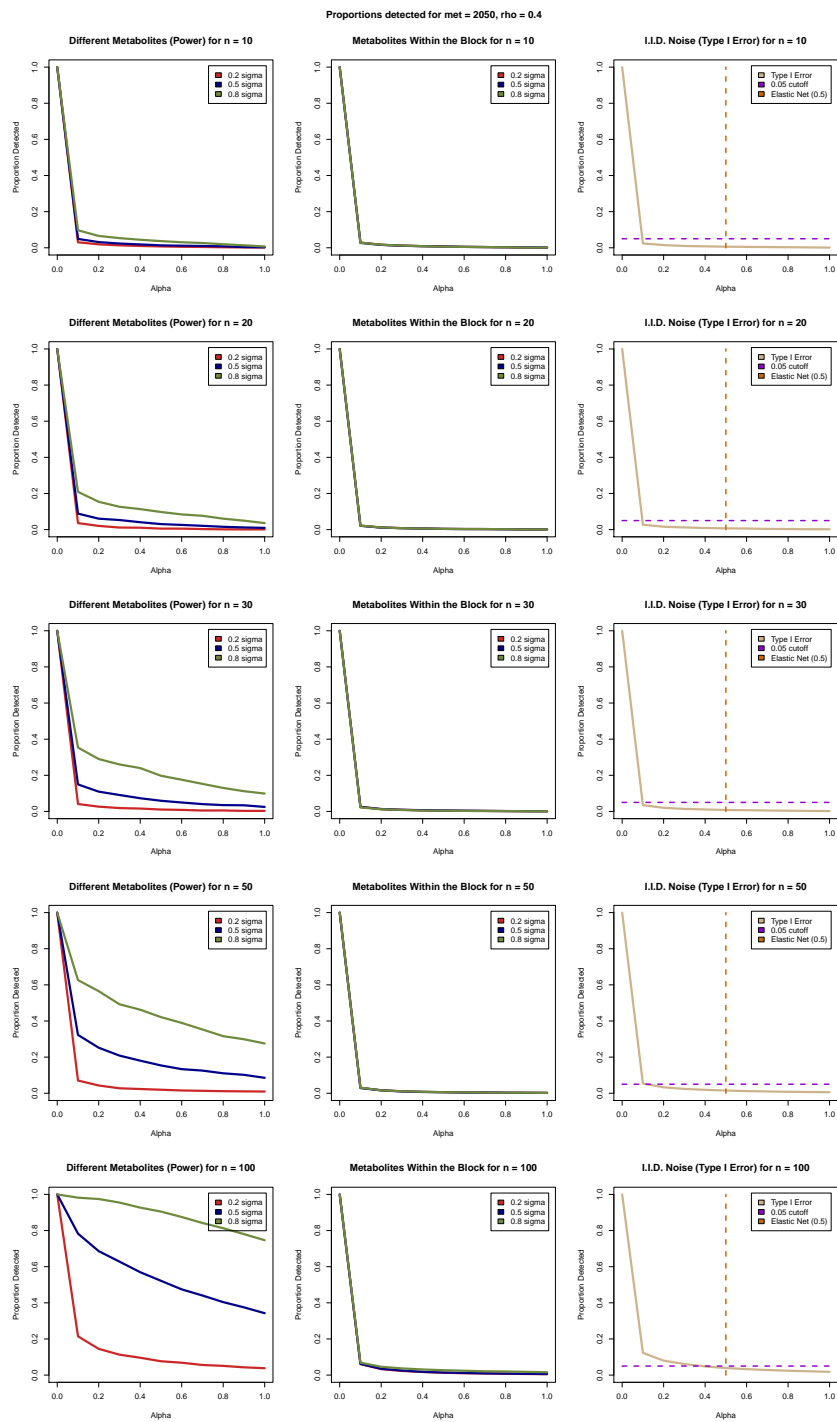

**Figure C.** Visualization of power (left column) and Type I error (right column) estimates for  $p = 2050$  features,  $\rho = 0.4$ , and multiple sample sizes. Each row of plots corresponds to different sample size. The value of the penalty split parameter  $\alpha$  is plotted on the  $x$ -axis. Type I error and power estimates are plotted on  $y$ -axis for the values of  $\alpha$  in the range of  $[0; 1]$  with 0.1 increments. In the left column power estimates are provided based on the four different features for each of the effect sizes ( $\Delta_1 = 0.2$  is the red line,  $\Delta_2 = 0.5$  is the blue line, and  $\Delta_3 = 0.8$  is the green line). In the right column Type I error estimates are provided (beige lines) based on the random noise features together with a 0.05 threshold plotted as a purple dashed line. The vertical dashed line in the right column plots corresponds to penalty split value  $\alpha = 0.5$ . In the middle column of the plots the proportions of detected non-different features within each block correlated to different ones for each of the blocks and corresponding effect sizes ( $\Delta_1 = 0.2$  is the red line,  $\Delta_2 = 0.5$  is the blue line, and  $\Delta_3 = 0.8$  is the green line) are displayed.

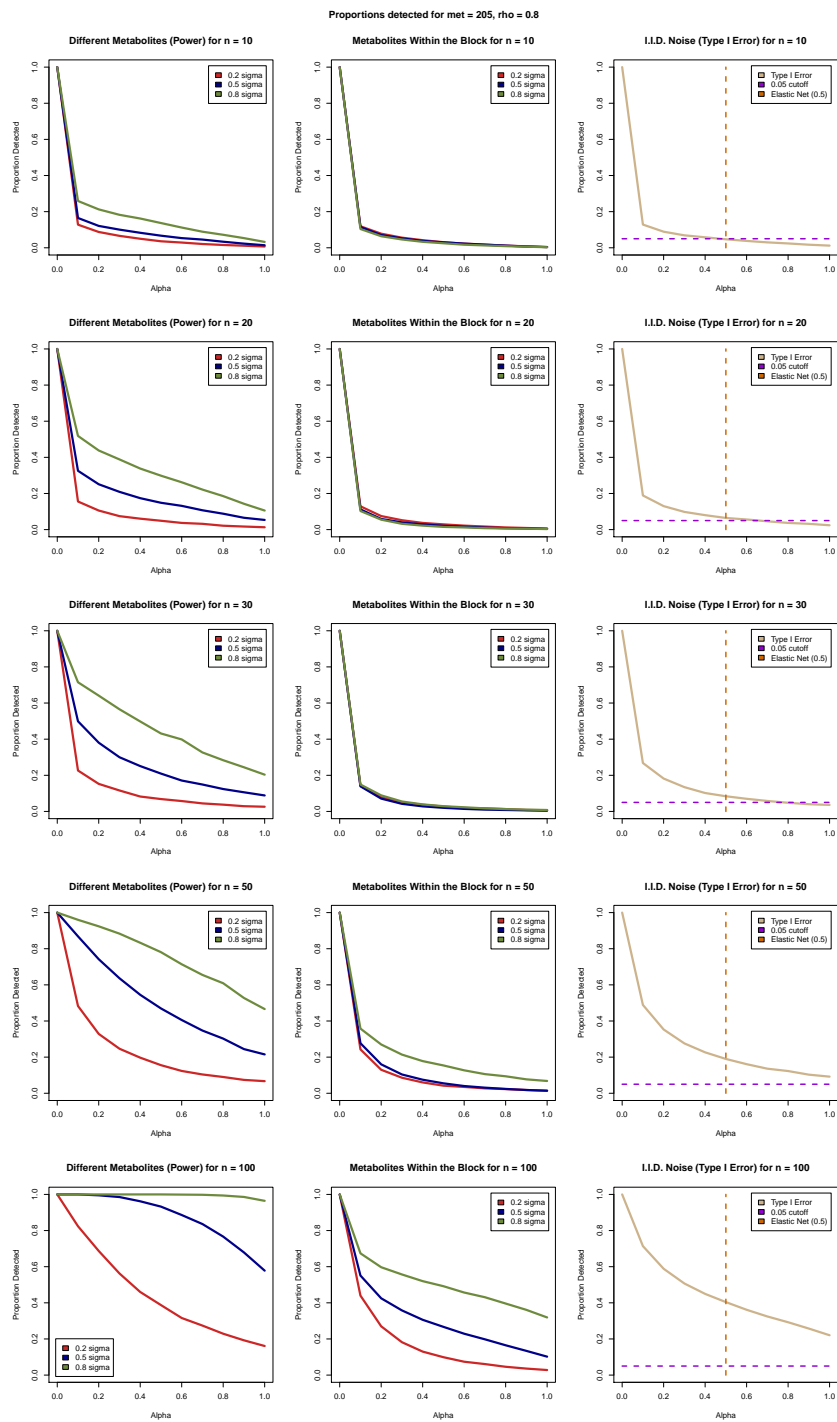

**Figure D.** Visualization of power (left column) and Type I error (right column) estimates for  $p = 205$  features,  $\rho = 0.8$ , and multiple sample sizes. Each row of plots corresponds to different sample size. The value of the penalty split parameter  $\alpha$  is plotted on the  $x$ -axis. Type I error and power estimates are plotted on  $y$ -axis for the values of  $\alpha$  in the range of  $[0; 1]$  with 0.1 increments. In the left column power estimates are provided based on the four different features for each of the effect sizes ( $\Delta_1 = 0.2$  is the red line,  $\Delta_2 = 0.5$  is the blue line, and  $\Delta_3 = 0.8$  is the green line). In the right column Type I error estimates are provided (beige lines) based on the random noise features together with a 0.05 threshold plotted as a purple dashed line. The vertical dashed line in the right column plots corresponds to penalty split value  $\alpha = 0.5$ . In the middle column of the plots the proportions of detected non-different features within each block correlated to different ones for each of the blocks and corresponding effect sizes ( $\Delta_1 = 0.2$  is the red line,  $\Delta_2 = 0.5$  is the blue line, and  $\Delta_3 = 0.8$  is the green line) are displayed.



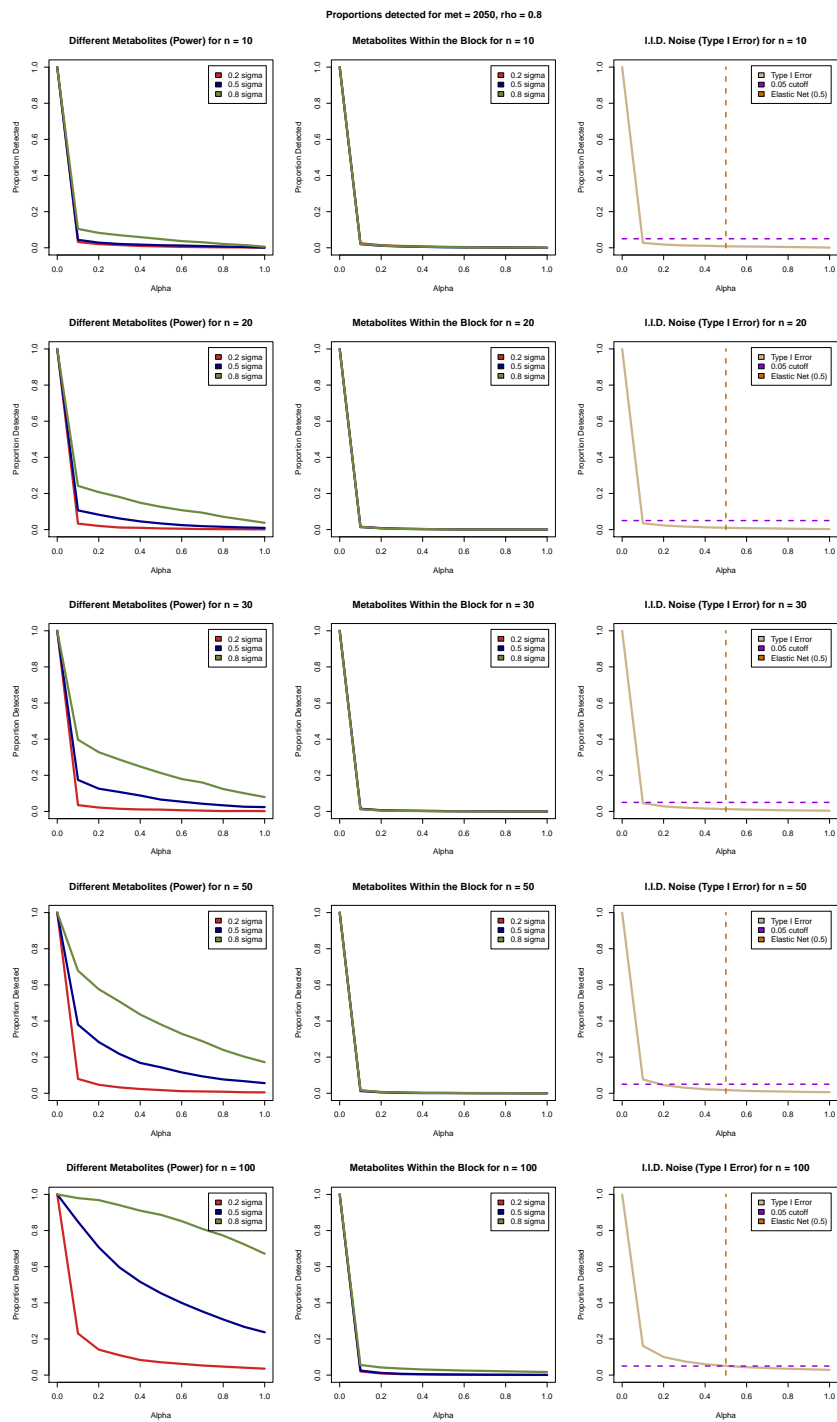

**Figure E.** Visualization of power (left column) and Type I error (right column) estimates for  $p = 2050$  features,  $\rho = 0.8$ , and multiple sample sizes. Each row of plots corresponds to different sample size. The value of the penalty split parameter  $\alpha$  is plotted on the  $x$ -axis. Type I error and power estimates are plotted on  $y$ -axis for the values of  $\alpha$  in the range of  $[0; 1]$  with 0.1 increments. In the left column power estimates are provided based on the four different features for each of the effect sizes ( $\Delta_1 = 0.2$  is the red line,  $\Delta_2 = 0.5$  is the blue line, and  $\Delta_3 = 0.8$  is the green line). In the right column Type I error estimates are provided (beige lines) based on the random noise features together with a 0.05 threshold plotted as a purple dashed line. The vertical dashed line in the right column plots corresponds to penalty split value  $\alpha = 0.5$ . In the middle column of the plots the proportions of detected non-different features within each block correlated to different ones for each of the blocks and corresponding effect sizes ( $\Delta_1 = 0.2$  is the red line,  $\Delta_2 = 0.5$  is the blue line, and  $\Delta_3 = 0.8$  is the green line) are displayed.

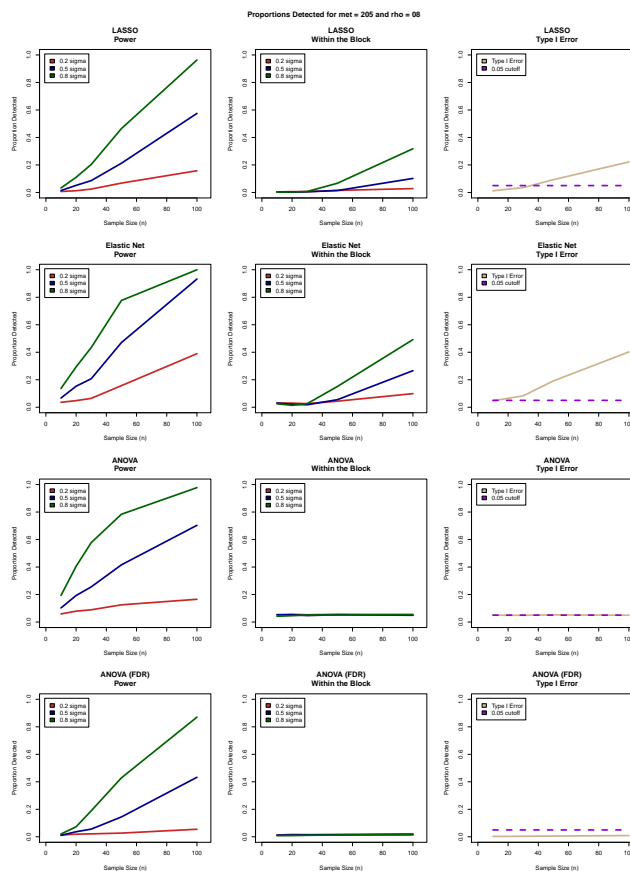

**Figure F.** Visualization of power and Type I error estimates comparison for  $p = 205$  features, correlation  $\rho = 0.8$ , and all sample sizes. Each row of the plots corresponds to a feature selection method. ANOVA FDR adjustment cutoff is 0.2. The value of the sample size ( $n$ ) is displayed on the  $x$ -axis in all plots. The estimates of power and Type I error are provided on the  $y$ -axis. In the left column power estimates are provided based on the four different features for each of the effect sizes ( $\Delta_1 = 0.2$  is the red line,  $\Delta_2 = 0.5$  is the blue line, and  $\Delta_3 = 0.8$  is the green line). In the right column Type I error estimates are provided (beige lines) based on the random noise features together with a 0.05 threshold plotted as a purple dashed line. In the middle column the proportions of non-different detected features within each block correlated to different ones for each of the blocks and corresponding effect sizes ( $\Delta_1 = 0.2$  is the red line,  $\Delta_2 = 0.5$  is the blue line, and  $\Delta_3 = 0.8$  is the green line) are displayed.

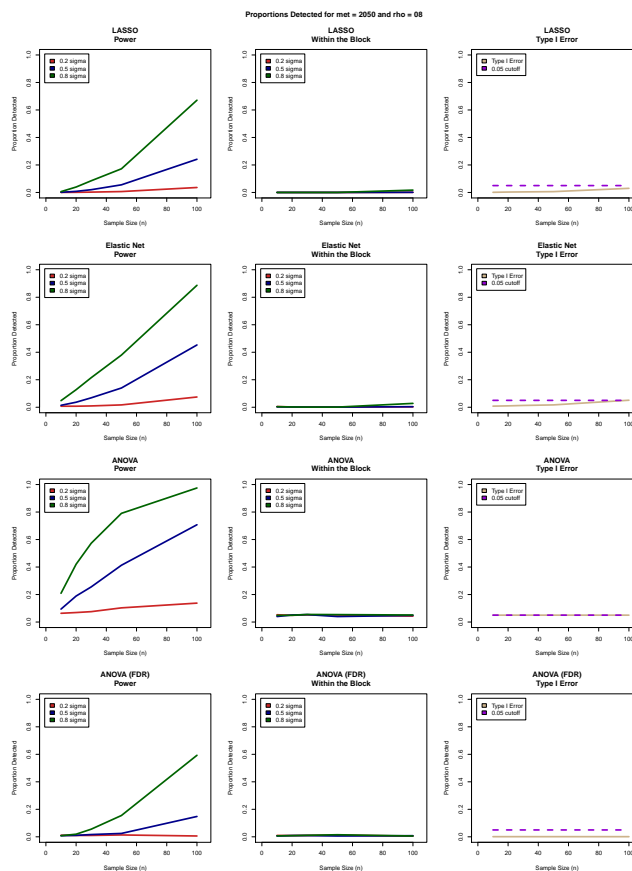

**Figure G.** Visualization of power and Type I error estimates comparison for  $p = 2050$  features, correlation  $\rho = 0.8$ , and all sample sizes. Each row of the plots corresponds to a feature selection method. ANOVA FDR adjustment cutoff is 0.2. The value of the sample size ( $n$ ) is displayed on the  $x$ -axis in all plots. The estimates of power and Type I error are provided on the  $y$ -axis. In the left column power estimates are provided based on the four different features for each of the effect sizes ( $\Delta_1 = 0.2$  is the red line,  $\Delta_2 = 0.5$  is the blue line, and  $\Delta_3 = 0.8$  is the green line). In the right column Type I error estimates are provided (beige lines) based on the random noise features together with a 0.05 threshold plotted as a purple dashed line. In the middle column the proportions of non-different detected features within each block correlated to different ones for each of the blocks and corresponding effect sizes ( $\Delta_1 = 0.2$  is the red line,  $\Delta_2 = 0.5$  is the blue line, and  $\Delta_3 = 0.8$  is the green line) are displayed.

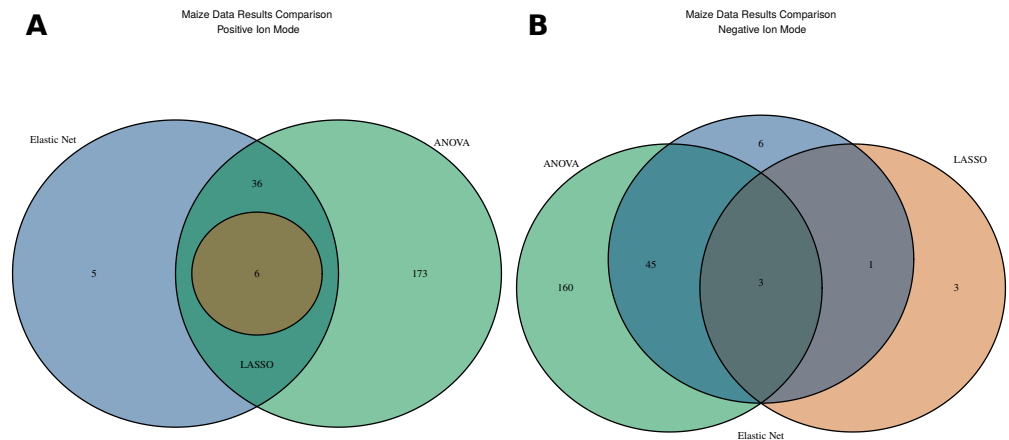

**Figure H.** Comparison of the variable selection methods for maize data using Venn diagrams. The results are provided for both positive and negative ion modes and for 0.05 cut off without adjustment for multiple testing. The results are provided in panels A) and B) for positive and negative modes respectively.

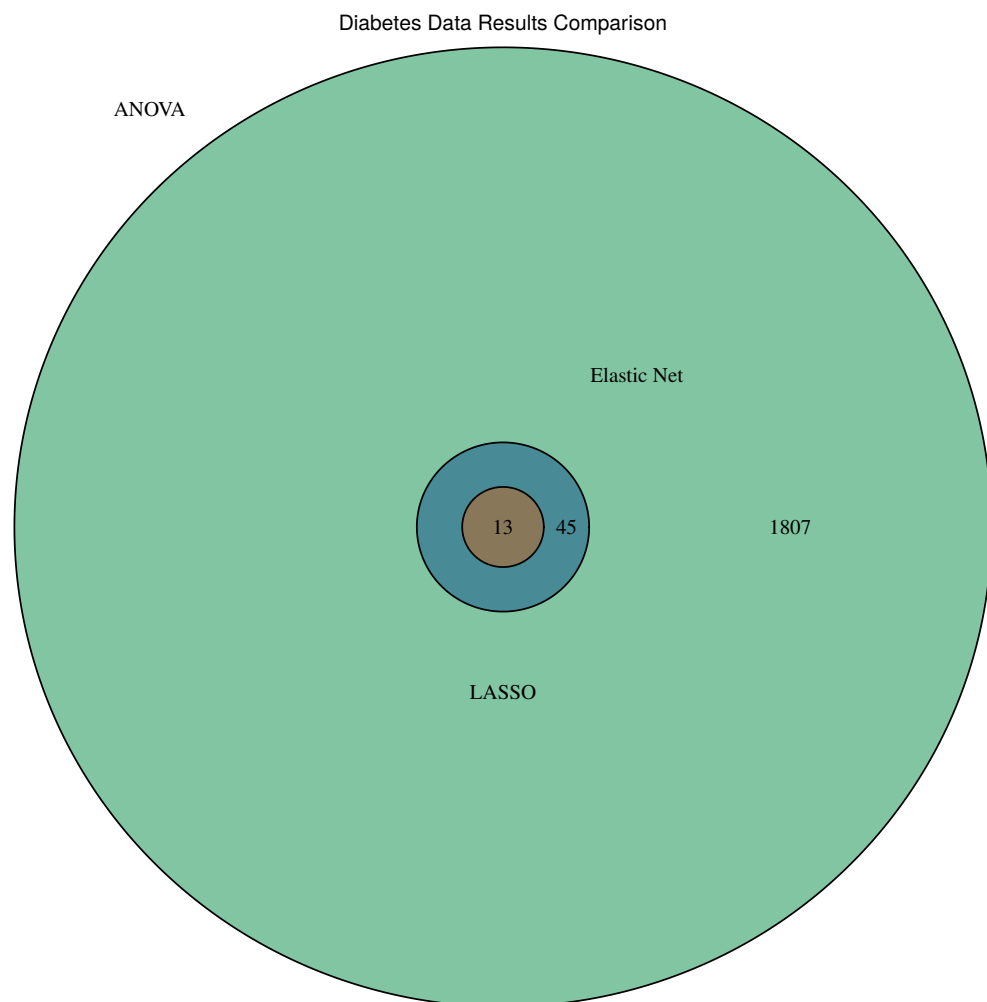

**Figure I.** Venn diagrams of the comparison of the variable selection methods for diabetes data. The results are presented for 0.05 cut off without FDR correction.

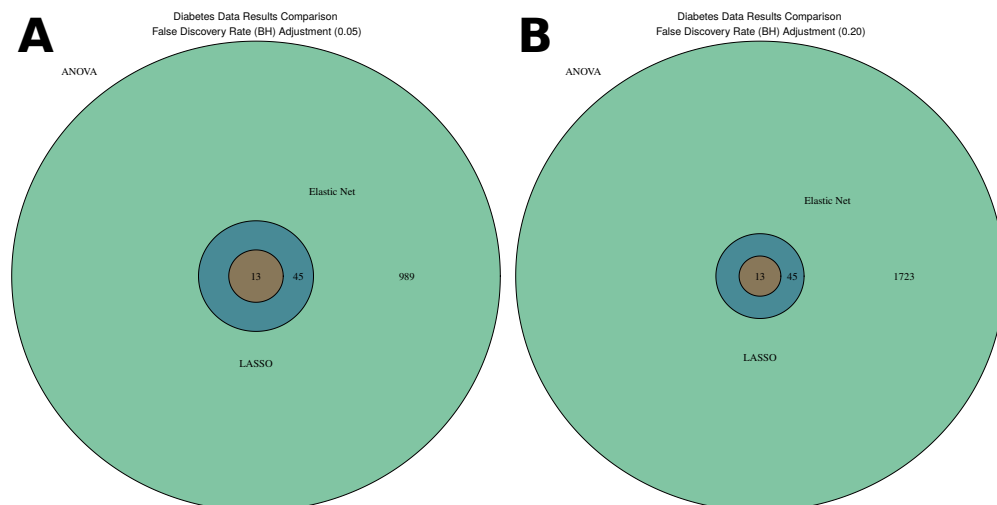

**Figure J.** Venn diagrams showing the results for the diabetes data. Panel A shows the overlap between ANOVA results with an FDR 0.05, LASSO and Elastic Net. Panel B shows the overlap between ANOVA results with an FDR 0.20, LASSO and Elastic Net. LASSO results are in brown and a subset of the Elastic Net results in Blue which are a subset of the ANOVA results shown in Green
